# Supplementary material for: Mg–Ti co-doping behavior of porous LiFePO4 microspheres for high-rate lithium-ion batteries
Source: Royal Society of Chemistry journal article supplement (doi:10.1039/c7ta04426g), 2017-01-01
Supplement: c7ta04426g1.pdf [file c7ta04426g1.pdf]

## Supporting Information

### **Mg-Ti co-doping behavior of porous LiFePO<sub>4</sub> microspheres for high-rate lithium-ion batteries**

Jiguo Tu,<sup>a,b</sup> Kai Wu,<sup>c</sup> Hui Tang,<sup>c</sup> Henghui Zhou\*<sup>c</sup> and Shuqiang Jiao\*<sup>a</sup>

---

<sup>a</sup> *State Key Laboratory of Advanced Metallurgy, University of Science and Technology Beijing, Beijing, 100083, P.R. China. Email: sjiao@ustb.edu.cn; Tel. +86-10-62333617; Fax. +86-10-62333617*

<sup>b</sup> *National Center for Materials Service Safety, University of Science and Technology Beijing, Beijing, 100083, P.R. China.*

<sup>c</sup> *College of Chemistry and Molecular Engineering, Peking University, Beijing, 100871, P.R. China. Email: hhzhou@pku.edu.cn; Tel. +86-10-62757908; Fax. +86-10-62757908*

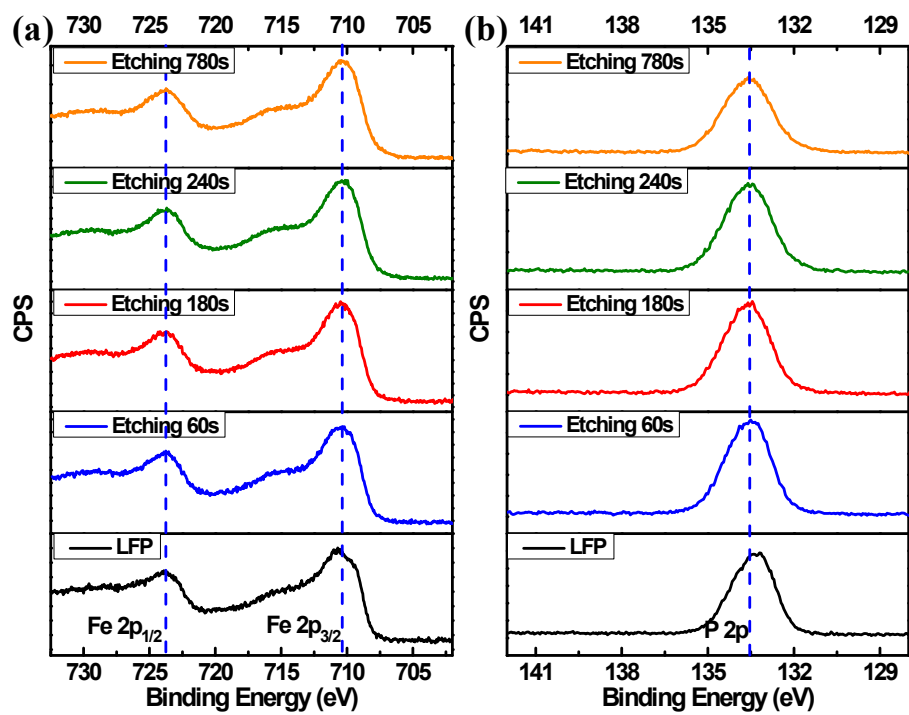

Fig. S1. XPS spectra of Fe 2p (a) and P 2p (b) of LFP microspheres over different etching times.

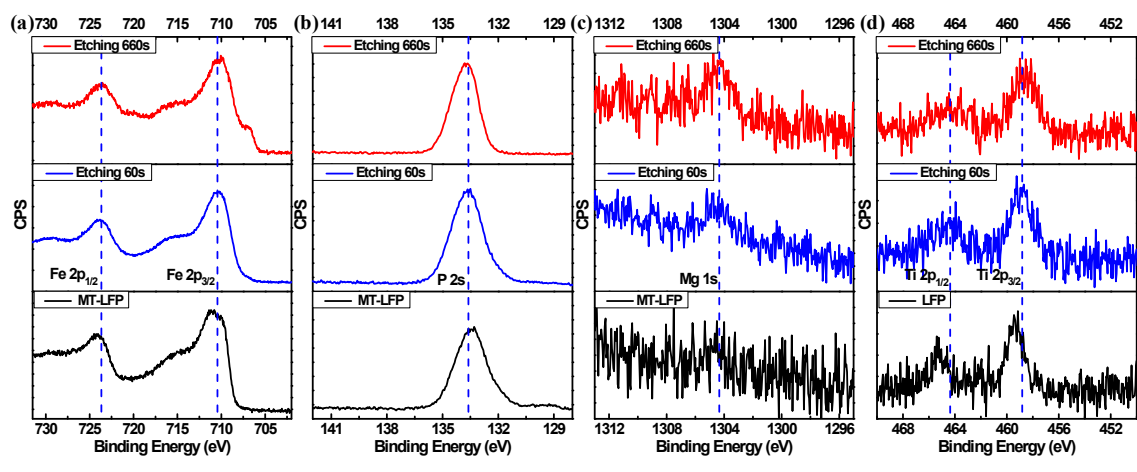

Fig. S2. XPS spectra of Fe 2p (a), P 2p (b), Mg 1s (c) and Ti 2p (d) of MT-LFP microspheres over different etching times.

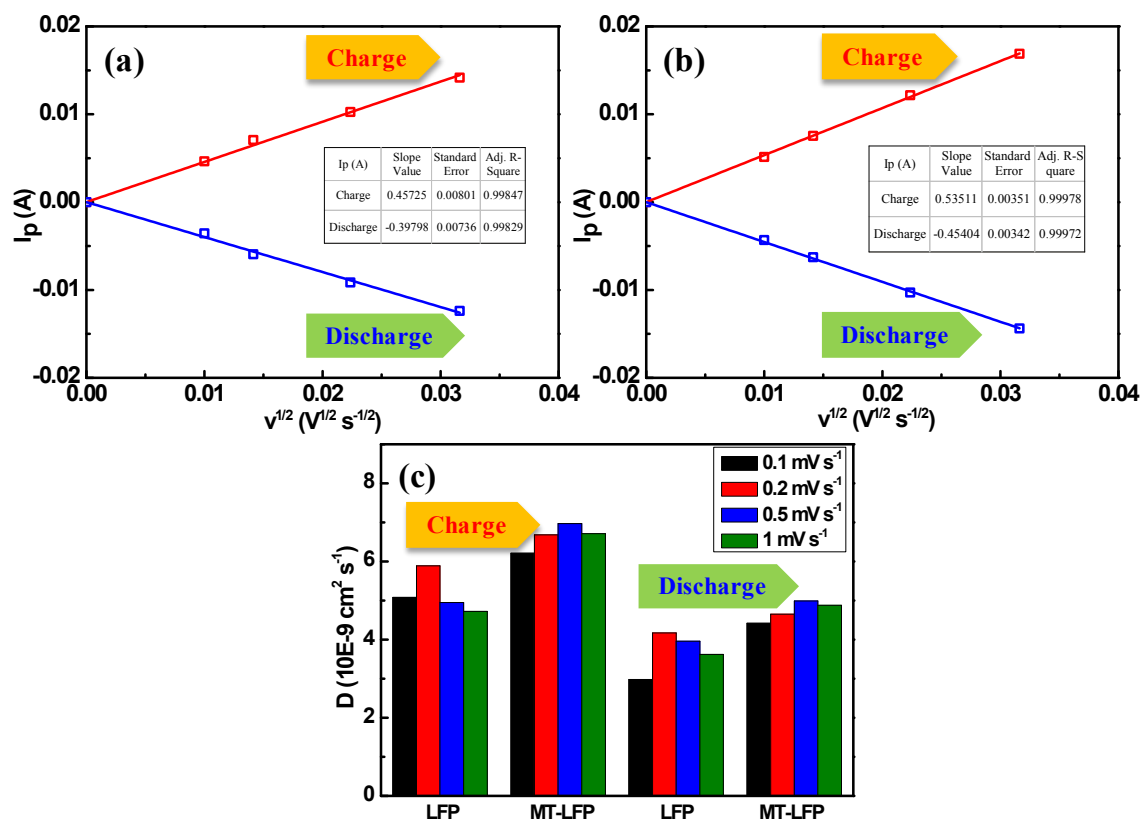

**Fig. S3.** The linear fitting curves of  $I_p-v^{1/2}$  of the as-prepared LFP (a) and MT-LFP (b), and the histogram of Li-ion diffusion coefficients of LFP and MT-LFP cathode during the charge and discharge process with different scan rates (c).

**Table S1.** Lattice parameters and unit cell volume of the LFP and MT-LFP samples.

| Samples | $a$ (Å) | $b$ (Å) | $c$ (Å) | Volume (Å <sup>3</sup> ) |
|---------|---------|---------|---------|--------------------------|
| LFP     | 10.3274 | 6.0065  | 4.6915  | 291.02                   |
| MT-LFP  | 10.3259 | 6.0057  | 4.6916  | 290.95                   |

**Table S2.** The atomic ratio of primary orbital peak of undoped LiFePO<sub>4</sub> microspheres under different etching time.

| Etching time (s) | O 1s  | Fe 2p <sub>3/2</sub> | P 2p  |
|------------------|-------|----------------------|-------|
| 0                | 73.16 | 7.95                 | 18.99 |
| 60               | 69.68 | 10.08                | 20.24 |
| 180              | 68.01 | 11.31                | 20.68 |
| 240              | 66.65 | 12.74                | 20.61 |
| 780              | 65.55 | 13.67                | 20.78 |

**Table S3.** The atomic ratio of primary orbital peak of Mg-Ti co-doped LiFePO<sub>4</sub> microspheres under different etching time.

| Etching time (s) | O 1s  | Fe 2p <sub>3/2</sub> | P 2p  | Mg 1s | Ti 2p <sub>3/2</sub> |
|------------------|-------|----------------------|-------|-------|----------------------|
| 0                | 68.37 | 9.28                 | 21.66 | 0.37  | 0.30                 |
| 60               | 63.12 | 14.94                | 21.20 | 0.47  | 0.27                 |
| 660              | 60.82 | 17.29                | 20.84 | 0.72  | 0.33                 |

**Table S4.** The Li-ion diffusion coefficients of the as-prepared LFP and MT-LFP cathodes at different scan rates.

| Samples |           | 0.1 mV s <sup>-1</sup> | 0.2 mV s <sup>-1</sup> | 0.5 mV s <sup>-1</sup> | 1 mV s <sup>-1</sup> |
|---------|-----------|------------------------|------------------------|------------------------|----------------------|
| LFP     | Charge    | 5.08E-9                | 5.89E-9                | 4.95E-9                | 4.72E-9              |
|         | Discharge | 2.98E-9                | 4.17E-9                | 3.96E-9                | 3.62E-9              |
| MT-LFP  | Charge    | 6.21E-9                | 6.68E-9                | 6.97E-9                | 6.71E-9              |
|         | Discharge | 4.42E-9                | 4.65E-9                | 4.99E-9                | 4.88E-9              |
